# Supplementary material
Source: publisher figshare collection journal article supplement (https://gsajournals.figshare.com/ndownloader/files/12125192)
Supplement: Supplementary file 1 [file 12125192]

## Sheet: Sheet1
Table 4. miRNA targeting LEA_2 upland cotton genes
miRNA_Acc.	Target_Acc.	Expectation	UPE$	miRNA_start	miRNA_end	Target_start	Target_end	miRNA_aligned_fragment	Target_aligned_fragment	Inhibition
ghr-miR156a	CotAD_32487	5	15.296	1	20	359	378	UGACAGAAGAGAGUGAGCAC	CCGUUCAGUCUUUUCCGUUA	Cleavage
ghr-miR156a	CotAD_39719	4.5	2.145	1	20	362	381	UGACAGAAGAGAGUGAGCAC	CCUCUUCCUCUCAUCUGUCA	Cleavage
ghr-miR156b	CotAD_32487	5	15.296	1	20	359	378	UGACAGAAGAGAGUGAGCAC	CCGUUCAGUCUUUUCCGUUA	Cleavage
ghr-miR156b	CotAD_39719	4.5	2.145	1	20	362	381	UGACAGAAGAGAGUGAGCAC	CCUCUUCCUCUCAUCUGUCA	Cleavage
ghr-miR156d	CotAD_32487	5	15.296	1	20	359	378	UGACAGAAGAGAGUGAGCAC	CCGUUCAGUCUUUUCCGUUA	Cleavage
ghr-miR156d	CotAD_39719	4.5	2.145	1	20	362	381	UGACAGAAGAGAGUGAGCAC	CCUCUUCCUCUCAUCUGUCA	Cleavage
ghr-miR164	CotAD_03784	5	15.212	1	21	11	31	UGGAGAAGCAGGGCACGUGCA	UUAACGUAUCCUGUUUCUUAA	Cleavage
ghr-miR164	CotAD_19375	5	9.024	1	21	101	121	UGGAGAAGCAGGGCACGUGCA	UGUCUGUGCCCUUCUUUUUCU	Translation
ghr-miR164	CotAD_24497	5	14.241	1	21	77	97	UGGAGAAGCAGGGCACGUGCA	UUAACGUAUCCUGUUUCUUAA	Cleavage
ghr-miR164	CotAD_63174	5	17.92	1	21	771	791	UGGAGAAGCAGGGCACGUGCA	CGCACAUGGUUUGCUUAUUCA	Cleavage
ghr-miR2948-5p	CotAD_00799	4.5	11.968	1	22	475	496	UGUGGGAGAGUUGGGCAAGAAU	UGGCUUGUCCAGCUUGUUUACA	Cleavage
ghr-miR2948-5p	CotAD_33143	4	11.427	1	22	28	49	UGUGGGAGAGUUGGGCAAGAAU	UGGCUUGUCCAACUUGUUUACA	Cleavage
ghr-miR2949a-3p	CotAD_00275	5	14.937	1	21	594	614	UGCAAAUCCAGUCAAAAGUUA	CAAUUUGAGACCGGAUUUGAA	Translation
ghr-miR2949a-5p	CotAD_17101	4	19.674	1	22	572	593	ACUUUUGAACUGGAUUUGCCGA	CUGGCAGGUUCAGGCCAAAGGU	Translation
ghr-miR2949a-5p	CotAD_31140	4.5	12.572	1	22	725	746	ACUUUUGAACUGGAUUUGCCGA	ACUGCAAAUUCAGAUUGAAGCU	Translation
ghr-miR2949a-5p	CotAD_64004	4.5	15.952	1	22	616	637	ACUUUUGAACUGGAUUUGCCGA	CAGGCAAUUCAAGAACAGAAGU	Translation
ghr-miR2949b	CotAD_17101	5	19.674	1	22	572	593	UCUUUUGAACUGGAUUUGCCGA	CUGGCAGGUUCAGGCCAAAGGU	Translation
ghr-miR2949c	CotAD_17101	5	19.674	1	22	572	593	UCUUUUGAACUGGAUUUGCCGA	CUGGCAGGUUCAGGCCAAAGGU	Translation
ghr-miR2950	CotAD_01385	5	18.97	1	21	335	355	UGGUGUGCAGGGGGUGGAAUA	ACGUCUACUCCAUGGACAUCA	Translation
ghr-miR2950	CotAD_15892	4.5	14.475	1	21	563	583	UGGUGUGCAGGGGGUGGAAUA	CUUUCUAUGCCUUCCACGUCA	Cleavage
ghr-miR2950	CotAD_31860	4.5	20.121	1	21	1309	1329	UGGUGUGCAGGGGGUGGAAUA	AGAUCUGUCUCCUUCACGCCA	Cleavage
ghr-miR2950	CotAD_31869	4.5	21.99	1	21	73	93	UGGUGUGCAGGGGGUGGAAUA	GGUGUCAUCACCUGCACACUU	Cleavage
ghr-miR2950	CotAD_46888	5	1.777	1	21	122	142	UGGUGUGCAGGGGGUGGAAUA	CUUUCCACCUCAUCUCCAUCA	Translation
ghr-miR2950	CotAD_61391	5	1.321	1	21	122	142	UGGUGUGCAGGGGGUGGAAUA	CUUUCCACCUCAUCUCCAUCA	Translation
ghr-miR2950	CotAD_65119	5	22.676	1	21	73	93	UGGUGUGCAGGGGGUGGAAUA	GGUGUCAUCAUCUGCACACUC	Cleavage
ghr-miR2950	CotAD_66245	4.5	21.526	1	21	1309	1329	UGGUGUGCAGGGGGUGGAAUA	AGAUCUGUCUCCUUCACGCCA	Cleavage
ghr-miR3476-5p	CotAD_11878	5	3.475	1	21	227	247	UGAACUGGGUUUGUUGGCUGC	ACGUCCAACUCACCCAAUUCA	Translation
ghr-miR3476-5p	CotAD_24499	5	5.329	1	21	227	247	UGAACUGGGUUUGUUGGCUGC	ACGUCCAACUCACCCAAUUCA	Translation
ghr-miR3476-5p	CotAD_65119	5	18.478	1	21	358	378	UGAACUGGGUUUGUUGGCUGC	GAAGUAAAUAAGAACAGUUCG	Translation
ghr-miR390a	CotAD_19205	4.5	16.351	1	21	553	573	AAGCUCAGGAGGGAUAGCGCC	ACCUCUACCCCUUUAGAGCUU	Cleavage
ghr-miR390b	CotAD_19205	4.5	16.351	1	21	553	573	AAGCUCAGGAGGGAUAGCGCC	ACCUCUACCCCUUUAGAGCUU	Cleavage
ghr-miR390c	CotAD_19205	4.5	16.351	1	21	553	573	AAGCUCAGGAGGGAUAGCGCC	ACCUCUACCCCUUUAGAGCUU	Cleavage
ghr-miR393	CotAD_64346	5	22.551	1	22	371	392	UCCAAAGGGAUCGCAUUGAUCU	ACGGCAAUGCGGUGCCUGUGGC	Translation
ghr-miR396a	CotAD_41925	4.5	19.38	1	21	469	489	UUCCACAGCUUUCUUGAACUG	UCGUUCAAUGAAUUUGUGGUA	Translation
ghr-miR396b	CotAD_41925	4.5	19.38	1	21	469	489	UUCCACAGCUUUCUUGAACUG	UCGUUCAAUGAAUUUGUGGUA	Translation
ghr-miR399a	CotAD_35514	4.5	14.772	1	21	467	487	CGCCAAUGGAGAUUUGUCCGG	AAGGACAUAUACCCAUUGGUA	Translation
ghr-miR399b	CotAD_35514	4.5	14.772	1	21	467	487	CGCCAAUGGAGAUUUGUCCGG	AAGGACAUAUACCCAUUGGUA	Translation
ghr-miR482a	CotAD_33143	4	11.706	1	22	461	482	UCUUUCCUACUCCUCCCAUACC	AACAUGGGAUUAAUAGGGAAGG	Translation
ghr-miR482a	CotAD_33144	4	17.285	1	22	986	1007	UCUUUCCUACUCCUCCCAUACC	AACAUGGGAUCAAUAGGGAAGG	Translation
ghr-miR482b	CotAD_19214	5	12.827	1	22	478	499	UCUUGCCUACUCCACCCAUGCC	CCCAUUGGUAAAGAUGGCAAGA	Translation
ghr-miR482b	CotAD_35514	5	11.919	1	22	478	499	UCUUGCCUACUCCACCCAUGCC	CCCAUUGGUAAAGAUGGCAAGA	Translation
ghr-miR7484a	CotAD_14147	4.5	5.229	1	23	1	23	UUUGUAUAUUAGAUCAAAGAGCA	GUAGCUAUGAACCAAUAAACAAA	Translation
ghr-miR7484b	CotAD_14147	4.5	5.229	1	23	1	23	UUUGUAUAUUAGAUCAAAGAGCA	GUAGCUAUGAACCAAUAAACAAA	Translation
ghr-miR7488	CotAD_46270	3.5	19.88	1	21	443	463	UUUUGAGUACAGGGGACAAAA	CGUUGUCCCCCGUACUCGGUA	Translation
ghr-miR7488	CotAD_67823	4.5	18.236	1	21	416	436	UUUUGAGUACAGGGGACAAAA	CGUUAUCCCCCGUACUCGGUA	Translation
ghr-miR7491	CotAD_13827	5	8.891	1	24	79	103	UGGGAUCUUCGAGAGGAU-UGAGCC	AACCCACAUUUUAUCGAAGAUCCUG	Cleavage
ghr-miR7492a	CotAD_00799	4	14.107	1	23	865	887	CUAUAGAACAUGAUCUUUAGCGG	UCGACAAAGAUCGUGUACUAUAC	Cleavage
ghr-miR7492a	CotAD_15892	4	18.207	1	23	820	842	CUAUAGAACAUGAUCUUUAGCGG	AUGGUGAAAACCAAGUUCUAUGG	Translation
ghr-miR7492a	CotAD_19205	4	18.341	1	23	790	812	CUAUAGAACAUGAUCUUUAGCGG	AUGGUGAAAACCAAGUUCUAUGG	Translation
ghr-miR7492a	CotAD_31860	5	11.829	1	23	21	43	CUAUAGAACAUGAUCUUUAGCGG	CUGUUCAGUAUUAUCUUCUGUGG	Translation
ghr-miR7492a	CotAD_31936	4.5	21.093	1	23	748	770	CUAUAGAACAUGAUCUUUAGCGG	UUGGUGAAGCCCAAGUUCUAUAA	Translation
ghr-miR7492a	CotAD_33143	4	18.145	1	23	418	440	CUAUAGAACAUGAUCUUUAGCGG	UCGACAAAGAUCGUGUACUAUAC	Cleavage
ghr-miR7492a	CotAD_40324	4	16.702	1	23	814	836	CUAUAGAACAUGAUCUUUAGCGG	CUGGUAAAGACAAAGUUUUAUGG	Translation
ghr-miR7492a	CotAD_41925	4.5	20.763	1	23	829	851	CUAUAGAACAUGAUCUUUAGCGG	UUGGUGAAGCCCAAGUUCUAUAA	Translation
ghr-miR7492a	CotAD_44357	5	22.418	1	23	814	836	CUAUAGAACAUGAUCUUUAGCGG	CUGGUAAAGACAAAGUGCUAUGG	Translation
ghr-miR7492a	CotAD_66245	5	13.283	1	23	21	43	CUAUAGAACAUGAUCUUUAGCGG	CUGUUCAGUAUUAUCUUCUGUGG	Translation
ghr-miR7492b	CotAD_00799	4	14.107	1	23	865	887	CUAUAGAACAUGAUCUUUAGCGG	UCGACAAAGAUCGUGUACUAUAC	Cleavage
ghr-miR7492b	CotAD_15892	4	18.207	1	23	820	842	CUAUAGAACAUGAUCUUUAGCGG	AUGGUGAAAACCAAGUUCUAUGG	Translation
ghr-miR7492b	CotAD_19205	4	18.341	1	23	790	812	CUAUAGAACAUGAUCUUUAGCGG	AUGGUGAAAACCAAGUUCUAUGG	Translation
ghr-miR7492b	CotAD_31860	5	11.829	1	23	21	43	CUAUAGAACAUGAUCUUUAGCGG	CUGUUCAGUAUUAUCUUCUGUGG	Translation
ghr-miR7492b	CotAD_31936	4.5	21.093	1	23	748	770	CUAUAGAACAUGAUCUUUAGCGG	UUGGUGAAGCCCAAGUUCUAUAA	Translation
ghr-miR7492b	CotAD_33143	4	18.145	1	23	418	440	CUAUAGAACAUGAUCUUUAGCGG	UCGACAAAGAUCGUGUACUAUAC	Cleavage
ghr-miR7492b	CotAD_40324	4	16.702	1	23	814	836	CUAUAGAACAUGAUCUUUAGCGG	CUGGUAAAGACAAAGUUUUAUGG	Translation
ghr-miR7492b	CotAD_41925	4.5	20.763	1	23	829	851	CUAUAGAACAUGAUCUUUAGCGG	UUGGUGAAGCCCAAGUUCUAUAA	Translation
ghr-miR7492b	CotAD_44357	5	22.418	1	23	814	836	CUAUAGAACAUGAUCUUUAGCGG	CUGGUAAAGACAAAGUGCUAUGG	Translation
ghr-miR7492b	CotAD_66245	5	13.283	1	23	21	43	CUAUAGAACAUGAUCUUUAGCGG	CUGUUCAGUAUUAUCUUCUGUGG	Translation
ghr-miR7492c	CotAD_00799	4	14.107	1	23	865	887	CUAUAGAACAUGAUCUUUAGCGG	UCGACAAAGAUCGUGUACUAUAC	Cleavage
ghr-miR7492c	CotAD_15892	4	18.207	1	23	820	842	CUAUAGAACAUGAUCUUUAGCGG	AUGGUGAAAACCAAGUUCUAUGG	Translation
ghr-miR7492c	CotAD_19205	4	18.341	1	23	790	812	CUAUAGAACAUGAUCUUUAGCGG	AUGGUGAAAACCAAGUUCUAUGG	Translation
ghr-miR7492c	CotAD_31860	5	11.829	1	23	21	43	CUAUAGAACAUGAUCUUUAGCGG	CUGUUCAGUAUUAUCUUCUGUGG	Translation
ghr-miR7492c	CotAD_31936	4.5	21.093	1	23	748	770	CUAUAGAACAUGAUCUUUAGCGG	UUGGUGAAGCCCAAGUUCUAUAA	Translation
ghr-miR7492c	CotAD_33143	4	18.145	1	23	418	440	CUAUAGAACAUGAUCUUUAGCGG	UCGACAAAGAUCGUGUACUAUAC	Cleavage
ghr-miR7492c	CotAD_40324	4	16.702	1	23	814	836	CUAUAGAACAUGAUCUUUAGCGG	CUGGUAAAGACAAAGUUUUAUGG	Translation
ghr-miR7492c	CotAD_41925	4.5	20.763	1	23	829	851	CUAUAGAACAUGAUCUUUAGCGG	UUGGUGAAGCCCAAGUUCUAUAA	Translation
ghr-miR7492c	CotAD_44357	5	22.418	1	23	814	836	CUAUAGAACAUGAUCUUUAGCGG	CUGGUAAAGACAAAGUGCUAUGG	Translation
ghr-miR7492c	CotAD_66245	5	13.283	1	23	21	43	CUAUAGAACAUGAUCUUUAGCGG	CUGUUCAGUAUUAUCUUCUGUGG	Translation
ghr-miR7494	CotAD_00799	5	20.864	1	23	607	629	AGCUUGUGGACUAGUUUUAACAA	CAUGGAAGAAUAGAGUACAAGCU	Translation
ghr-miR7494	CotAD_49818	5	21.424	1	23	542	564	AGCUUGUGGACUAGUUUUAACAA	CCUUUGAUACUGUUACGCAAGUU	Translation
ghr-miR7495a	CotAD_01700	4.5	15.86	1	21	692	712	UUACUUUAGAUGUCUCCUUCA	UUAAGGUGACGUGUAAGAUAA	Translation
ghr-miR7495a	CotAD_09578	4.5	15.642	1	21	692	712	UUACUUUAGAUGUCUCCUUCA	UUAAGGUGACGUGUAAGAUAA	Translation
ghr-miR7495b	CotAD_01700	4.5	15.86	1	21	692	712	UUACUUUAGAUGUCUCCUUCA	UUAAGGUGACGUGUAAGAUAA	Translation
ghr-miR7495b	CotAD_09578	4.5	15.642	1	21	692	712	UUACUUUAGAUGUCUCCUUCA	UUAAGGUGACGUGUAAGAUAA	Translation
ghr-miR7496a	CotAD_19375	4.5	19.844	1	24	185	208	AUGACCAAAUUGAUAGAAUGUGUA	CAAAUCUUGUAUCGAUUUGGUUGG	Cleavage
ghr-miR7496a	CotAD_69738	5	16.645	1	24	116	140	AUGACCAAAUUGAU-AGAAUGUGUA	UUUACAUUCUUGUUAUUAUGGUCAU	Translation
ghr-miR7496b	CotAD_19375	4.5	19.844	1	24	185	208	AUGACCAAAUUGAUAGAAUGUGUA	CAAAUCUUGUAUCGAUUUGGUUGG	Cleavage
ghr-miR7496b	CotAD_69738	5	16.645	1	24	116	140	AUGACCAAAUUGAU-AGAAUGUGUA	UUUACAUUCUUGUUAUUAUGGUCAU	Translation
ghr-miR7499	CotAD_01298	5	11.976	1	24	537	559	AUAUAAUUUUCGGUUAAUUCGGUU	GAUC-AAUAUAUUGAACAUUAUAA	Cleavage
ghr-miR7499	CotAD_64120	5	12.366	1	24	537	559	AUAUAAUUUUCGGUUAAUUCGGUU	GAUC-AAUAUAUUGAACAUUAUAA	Cleavage
ghr-miR7500	CotAD_27143	4.5	14.234	1	24	367	388	AUCGAGUUAUUCGAGUUAAUCGAG	UUU--UUAUUUUGAAAAACUCGUU	Translation
ghr-miR7501	CotAD_43605	5	11.252	1	24	6	29	AUAUCUGAUUCUGACACGAAAAAA	GUCAACGAAGUCGGAAUCGGAUAU	Cleavage
ghr-miR7504a	CotAD_00275	4	12.644	1	24	690	713	UAUGAAACUGUGAUUCCACGUCAU	GAAAGUUGGGAUCAGGGUUUCGUG	Translation
ghr-miR7504a	CotAD_13827	4	23.642	1	24	1013	1034	UAUGAAACUGUGAUUCCACGUCAU	AU--UGUGGCAUCAUAGUUUCAAG	Cleavage
ghr-miR7504a	CotAD_19107	5	18.765	1	24	438	459	UAUGAAACUGUGAUUCCACGUCAU	GUG--GUGGGGUCAUAGGUUUAAA	Cleavage
ghr-miR7504a	CotAD_26668	4.5	20.159	1	24	438	459	UAUGAAACUGUGAUUCCACGUCAU	GUG--GUGGGGUCAUAGGUUCAAA	Cleavage
ghr-miR7504a	CotAD_39719	4	12.906	1	24	690	713	UAUGAAACUGUGAUUCCACGUCAU	GAAAGUUGGGAUCAGGGUUUCGUG	Translation
ghr-miR7506	CotAD_23646	4.5	19.027	1	24	107	130	AUGUCUGGGACAUGGCGUUGGCAC	CAGCUUUCGCCAUUUUCCAGACAA	Translation
ghr-miR7506	CotAD_76129	4.5	21.882	1	24	26	49	AUGUCUGGGACAUGGCGUUGGCAC	UUGGCAAAGCCAUGUUUGAGACAG	Cleavage
ghr-miR7507	CotAD_17649	4.5	6.323	1	24	113	138	AAGGUAGUGAAGUAGGCAAU--UGGG	ACUACCGUUGCCUCCGCCACUGCCUC	Translation
ghr-miR7507	CotAD_23824	4.5	6.389	1	24	113	138	AAGGUAGUGAAGUAGGCAAU--UGGG	ACUACCGUUGCCUCCGCCACUGCCUC	Translation
ghr-miR7507	CotAD_27453	4.5	7.107	1	24	94	116	AAGGUAGUGAAGUAGGCAAUUGGG	CUCA-UUGUUUAUUUCACCGUUUU	Cleavage
ghr-miR7507	CotAD_32487	5	5.747	1	24	93	116	AAGGUAGUGAAGUAGGCAAUUGGG	UCUUAUCGUUUACUUCACCGUUUU	Cleavage
ghr-miR7507	CotAD_68063	4.5	7.107	1	24	94	116	AAGGUAGUGAAGUAGGCAAUUGGG	CUCA-UUGUUUAUUUCACCGUUUU	Cleavage
ghr-miR7509	CotAD_32847	5	14.294	1	24	84	108	UCAAAAGCACU-UUUUGACAGCAAU	UUUGGUUUGAAGAUAGUGCUUUUGG	Translation
ghr-miR7510a	CotAD_06037	4.5	16.043	1	24	417	440	AAGGUCAUGAUCUUUAGCGGCGUU	GACGGCGGUGAAGUUUAAGACCUU	Translation
ghr-miR7510a	CotAD_07087	5	15.779	1	24	579	602	AAGGUCAUGAUCUUUAGCGGCGUU	AUCUUUGCUGAAUUUCUUGGUCUU	Translation
ghr-miR7510a	CotAD_17649	4.5	16.537	1	24	523	546	AAGGUCAUGAUCUUUAGCGGCGUU	AAGGUUGAUGGAGAUCUUGGUCUU	Cleavage
ghr-miR7510a	CotAD_23824	4.5	13.509	1	24	520	543	AAGGUCAUGAUCUUUAGCGGCGUU	AAGGUUGAUGGAGAUCUUGGUCUU	Cleavage
ghr-miR7510a	CotAD_31140	5	13.831	1	24	636	659	AAGGUCAUGAUCUUUAGCGGCGUU	AAAGAUGAGAAAGGUCAAGAUCUU	Cleavage
ghr-miR7510a	CotAD_47322	4.5	14.566	1	24	417	440	AAGGUCAUGAUCUUUAGCGGCGUU	GACGGCGGUGAAGUUUAAGACCUU	Translation
ghr-miR7510b	CotAD_00799	5	14.666	1	23	862	884	AAGAACAUGAUCUUUAGCGGCGU	UUGUCGACAAAGAUCGUGUACUA	Cleavage
ghr-miR7510b	CotAD_17649	5	16.537	1	23	524	546	AAGAACAUGAUCUUUAGCGGCGU	AGGUUGAUGGAGAUCUUGGUCUU	Cleavage
ghr-miR7510b	CotAD_21924	5	14.52	1	23	165	187	AAGAACAUGAUCUUUAGCGGCGU	CCGCCGCUCAUGCUGUUGUUCUU	Translation
ghr-miR7510b	CotAD_23824	5	13.509	1	23	521	543	AAGAACAUGAUCUUUAGCGGCGU	AGGUUGAUGGAGAUCUUGGUCUU	Cleavage
ghr-miR7510b	CotAD_33143	5	17.755	1	23	415	437	AAGAACAUGAUCUUUAGCGGCGU	UUGUCGACAAAGAUCGUGUACUA	Cleavage
ghr-miR7510b	CotAD_46270	5	13.254	1	23	529	551	AAGAACAUGAUCUUUAGCGGCGU	GUGGCGUUGAGGGUAGUGUUGUU	Translation
ghr-miR7510b	CotAD_51667	5	22.2	1	23	452	474	AAGAACAUGAUCUUUAGCGGCGU	UCAUUGUUGAUGUUCCUGUUUUU	Translation
ghr-miR7510b	CotAD_64657	5	14.509	1	23	165	187	AAGAACAUGAUCUUUAGCGGCGU	CCGCCGCUCAUGCUGUUGUUCUU	Translation
ghr-miR7510b	CotAD_67823	5	14.932	1	23	502	524	AAGAACAUGAUCUUUAGCGGCGU	GUGGCGUUGAGGGUAGUGUUGUU	Translation
ghr-miR7510b	CotAD_72913	5	20.573	1	23	452	474	AAGAACAUGAUCUUUAGCGGCGU	UCAUUGUUGAUGUUCCUGUUUUU	Translation
ghr-miR7511	CotAD_48469	5	15.914	1	24	298	325	AGAAGUUUUGCA-UGUGUAGC---UGAG	GUCAAGAGCUUUGCAGUGCACAACUUCU	Cleavage
ghr-miR7513	CotAD_64347	5	21.285	1	21	686	706	AAUCAGCCAGGAAUCGUUUGA	CCAAAAGUUGCCUCGUUGGUU	Cleavage
ghr-miR7514	CotAD_13827	5	16.98	1	24	253	276	AUAAAGUGAUAAGUGAGAUCGUCU	AGCCAACCUCACCUGCCACUUCAU	Translation
ghr-miR827a	CotAD_31936	5	12.701	1	21	494	514	UUAGAUGACCAUCAACAAACA	CAUUUUUUGGGGUUCAUGUAA	Translation
ghr-miR827a	CotAD_35069	5	11.724	1	21	599	619	UUAGAUGACCAUCAACAAACA	CAUUUUUUGGGGUUCAUGUAA	Translation
ghr-miR827a	CotAD_41925	5	12.722	1	21	575	595	UUAGAUGACCAUCAACAAACA	CAUUUUUUGGGGUUCAUGUAA	Translation
ghr-miR827a	CotAD_62996	5	11.641	1	21	599	619	UUAGAUGACCAUCAACAAACA	CAUUUUUUGGGGUUCAUGUAA	Translation
ghr-miR827b	CotAD_31936	5	12.701	1	21	494	514	UUAGAUGACCAUCAACAAACA	CAUUUUUUGGGGUUCAUGUAA	Translation
ghr-miR827b	CotAD_35069	5	11.724	1	21	599	619	UUAGAUGACCAUCAACAAACA	CAUUUUUUGGGGUUCAUGUAA	Translation
ghr-miR827b	CotAD_41925	5	12.722	1	21	575	595	UUAGAUGACCAUCAACAAACA	CAUUUUUUGGGGUUCAUGUAA	Translation
ghr-miR827b	CotAD_62996	5	11.641	1	21	599	619	UUAGAUGACCAUCAACAAACA	CAUUUUUUGGGGUUCAUGUAA	Translation
ghr-miR827c	CotAD_31936	5	12.701	1	21	494	514	UUAGAUGACCAUCAACAAACA	CAUUUUUUGGGGUUCAUGUAA	Translation
ghr-miR827c	CotAD_35069	5	11.724	1	21	599	619	UUAGAUGACCAUCAACAAACA	CAUUUUUUGGGGUUCAUGUAA	Translation
ghr-miR827c	CotAD_41925	5	12.722	1	21	575	595	UUAGAUGACCAUCAACAAACA	CAUUUUUUGGGGUUCAUGUAA	Translation
ghr-miR827c	CotAD_62996	5	11.641	1	21	599	619	UUAGAUGACCAUCAACAAACA	CAUUUUUUGGGGUUCAUGUAA	Translation
